# Supplementary material for: Pairing FLUXNET sites to validate model representations of land-use/land-cover change
Source: Copernicus journal article supplement (doi:10.5194/hess-22-111-2018), 2018-01-08
Supplement: Supplementary file 1 [file hess-22-111-2018-supplement.pdf]

Supplement of Hydrol. Earth Syst. Sci., 22, 111–125, 2018  
<https://doi.org/10.5194/hess-22-111-2018-supplement>  
© Author(s) 2018. This work is distributed under  
the Creative Commons Attribution 3.0 License.

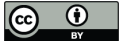

*Supplement of*

## **Pairing FLUXNET sites to validate model representations of land-use/land-cover change**

**Liang Chen et al.**

*Correspondence to:* Liang Chen (lchen15@gmu.edu)

The copyright of individual parts of the supplement might differ from the CC BY 3.0 License.

**Table S1.** Detailed information about the paired sites. Pairs 6, 8, 12 and 16 are obtained from AmeriFlux; the rest of the pairs are from the FLUXNET2015 dataset. The pairs are grouped based on the type of LULCC: pairs 1~5, deciduous broadleaf forest – cropland; pair 6, deciduous broadleaf forest – grassland; pair 7, deciduous broadleaf forest – grassland; pairs 8~15, evergreen broadleaf forest – grassland; pairs 16~25, evergreen needleleaf forest – open shrubland; pairs 26~27, evergreen needleleaf forest – cropland; pair 28, mixed forest – cropland..

| Pair ID | Name   | Latitude (degrees N) | Longitude (degrees E) | Elevation (m) | Land cover type              | Separation (km) | Period      |
|---------|--------|----------------------|-----------------------|---------------|------------------------------|-----------------|-------------|
| 1       | IT-CA2 | 42.3772              | 12.026                | 200           | Croplands                    | 0.36            | 2011 – 2013 |
|         | IT-CA1 | 42.3804              | 12.0266               | 200           | Deciduous Broadleaf Forests  |                 |             |
| 2       | IT-CA2 | 42.3772              | 12.026                | 200           | Croplands                    | 0.44            | 2011 – 2013 |
|         | IT-CA3 | 42.38                | 12.0222               | 197           | Deciduous Broadleaf Forests  |                 |             |
| 3       | IT-CA2 | 42.3772              | 12.026                | 200           | Croplands                    | 8.75            | 2011 – 2012 |
|         | IT-Ro2 | 42.3903              | 11.9209               | 160           | Deciduous Broadleaf Forests  |                 |             |
| 4       | FR-Gri | 48.8442              | 1.9519                | 125           | Croplands                    | 73.3            | 2005 – 2013 |
|         | FR-Fon | 48.4764              | 2.7801                | 90            | Deciduous Broadleaf Forests  |                 |             |
| 5       | BE-Lon | 50.5515              | 4.7461                | 165           | Croplands                    | 92.82           | 2004 – 2014 |
|         | BE-Vie | 50.3050              | 5.9980                | 491           | Deciduous Broadleaf Forests  |                 |             |
| 6       | US-Dk1 | 35.9712              | -79.0934              | 168           | Grasslands                   | 0.68            | 2003 – 2008 |
|         | US-Dk2 | 35.9736              | -79.1004              | 168           | Deciduous Broadleaf Forests  |                 |             |
| 7       | AU-Rig | -36.6499             | 145.5759              | 152           | Grasslands                   | 48.82           | 2011 – 2013 |
|         | AU-Whr | -36.6732             | 145.0294              | 165           | Evergreen Broadleaf Forests  |                 |             |
| 8       | US-Dk1 | 35.9712              | -79.0934              | 168           | Grasslands                   | 0.78            | 2004 – 2008 |
|         | US-Dk3 | 35.9782              | -79.0942              | 163           | Evergreen Needleleaf Forests |                 |             |
| 9       | CZ-BK2 | 49.4944              | 18.5429               | 855           | Grasslands                   | 0.96            | 2004 – 2006 |
|         | CZ-BK1 | 49.5021              | 18.5369               | 875           | Evergreen Needleleaf Forests |                 |             |

|    |        |         |           |      |                              |       |             |
|----|--------|---------|-----------|------|------------------------------|-------|-------------|
| 10 | DE-Gri | 50.9495 | 13.5125   | 385  | Grasslands                   | 4.12  | 2004 – 2010 |
|    | DE-Tha | 50.9636 | 13.5669   | 380  | Evergreen Needleleaf Forests |       |             |
| 11 | DE-Gri | 50.9495 | 13.5125   | 385  | Grasslands                   | 23.49 | 2008 – 2010 |
|    | DE-Obe | 50.7836 | 13.7196   | 735  | Evergreen Needleleaf Forests |       |             |
| 12 | US-Fwf | 35.4454 | -111.7718 | 2270 | Grasslands                   | 33.91 | 2006 – 2010 |
|    | US-Fmf | 35.1426 | -111.7273 | 546  | Evergreen Needleleaf Forests |       |             |
| 13 | NL-Hor | 52.2404 | 5.0713    | 2.2  | Grasslands                   | 46.55 | 2004 – 2011 |
|    | NL-Loo | 52.1666 | 5.7436    | 25   | Evergreen Needleleaf Forests |       |             |
| 14 | AT-Neu | 47.1167 | 11.3175   | 970  | Grasslands                   | 59.57 | 2002 – 2012 |
|    | IT-Ren | 46.5869 | 11.4337   | 1730 | Evergreen Needleleaf Forests |       |             |
| 15 | US-Var | 38.4133 | -120.9507 | 129  | Grasslands                   | 60.29 | 2000 – 2007 |
|    | US-Blo | 38.8953 | -120.6328 | 1315 | Evergreen Needleleaf Forests |       |             |
| 16 | US-NC1 | 35.8118 | -76.7119  | 5    | Open Shrublands              | 4.03  | 2005 – 2009 |
|    | US-NC2 | 35.803  | -76.6685  | 5    | Evergreen Needleleaf Forests |       |             |
| 17 | US-Wi6 | 46.6249 | -91.2982  | 371  | Open Shrublands              | 15.27 | 2002 – 2003 |
|    | US-Wi3 | 46.6347 | -91.0987  | 411  | Deciduous Broadleaf Forests  |       |             |
| 18 | US-Wi6 | 46.6249 | -91.2982  | 371  | Open Shrublands              | 16.22 | 2002 – 2003 |
|    | US-Wi4 | 46.7393 | -91.1663  | 352  | Evergreen Needleleaf Forests |       |             |
| 19 | US-Wi6 | 46.6249 | -91.2982  | 371  | Open Shrublands              | 16.57 | 2002        |
|    | US-Wi0 | 46.6188 | -91.0814  | 349  | Evergreen Needleleaf Forests |       |             |
| 20 | CA-SF3 | 54.0916 | -106.0053 | 540  | Open Shrublands              | 19.87 | 2001 – 2005 |
|    | CA-SF2 | 54.2539 | -105.8775 | 520  | Evergreen Needleleaf Forests |       |             |
| 21 | CA-NS6 | 55.9167 | -98.9644  | 244  | Open Shrublands              | 27.43 | 2001 – 2005 |
|    | CA-NS2 | 55.9058 | -98.5247  | 260  | Evergreen Needleleaf Forests |       |             |
| 22 | CA-NS6 | 55.9167 | -98.9644  | 244  | Open Shrublands              | 30.25 | 2001 – 2005 |
|    | CA-NS1 | 55.8792 | -98.4839  | 260  | Evergreen Needleleaf Forests |       |             |
| 23 | CA-NS6 | 55.9167 | -98.9644  | 244  | Open Shrublands              | 30.48 | 2001 – 2005 |
|    | CA-NS5 | 55.8631 | -98.485   | 260  | Evergreen Needleleaf Forests |       |             |

|    |        |         |           |        |                              |       |             |
|----|--------|---------|-----------|--------|------------------------------|-------|-------------|
| 24 | CA-NS6 | 55.9167 | -98.9644  | 244    | Open Shrublands              | 36.29 | 2001 – 2005 |
|    | CA-NS3 | 55.9117 | -98.3822  | 260    | Evergreen Needleleaf Forests |       |             |
| 25 | CA-SF3 | 54.0916 | -106.0053 | 540    | Open Shrublands              | 45.41 | 2003 – 2006 |
|    | CA-SF1 | 54.485  | -105.8176 | 536    | Evergreen Needleleaf Forests |       |             |
| 26 | DE-Kli | 50.8929 | 13.5225   | 480    | Croplands                    | 8.46  | 2004 – 2014 |
|    | DE-Tha | 50.9636 | 13.5669   | 380    | Evergreen Needleleaf Forests |       |             |
| 27 | DE-Kli | 50.8929 | 13.5225   | 480    | Croplands                    | 18.42 | 2008 – 2014 |
|    | DE-Obe | 50.7836 | 13.7196   | 735    | Evergreen Needleleaf Forests |       |             |
| 28 | DE-RuS | 50.8659 | 6.4472    | 102.76 | Croplands                    | 69.96 | 2011 – 2014 |
|    | BE-Vie | 50.3051 | 5.9981    | 493    | Mixed Forests                |       |             |

**Table S2.** Model scheme settings for Noah-MP used in this study.

| <b>model options</b>                         | <b>scheme used in this study</b> |
|----------------------------------------------|----------------------------------|
| dynamic vegetation                           | on                               |
| canopy stomatal resistance                   | Ball-Berry                       |
| soil moisture factor for stomatal resistance | Noah                             |
| runoff and groundwater                       | SIMGM                            |
| surface layer drag coefficient (CH & CM)     | Monin-Obukhov                    |
| supercooled liquid water                     | Niu & Yang 06                    |
| frozen soil permeability                     | Niu & Yang 06                    |
| radiation transfer                           | gap=F(3D,cosz)                   |
| snow surface albedo                          | CLASS                            |
| rainfall & snowfall                          | Jordan91                         |
| lower boundary of soil temperature           | Noah                             |
| snow/soil temperature time scheme            | semi-implicit                    |

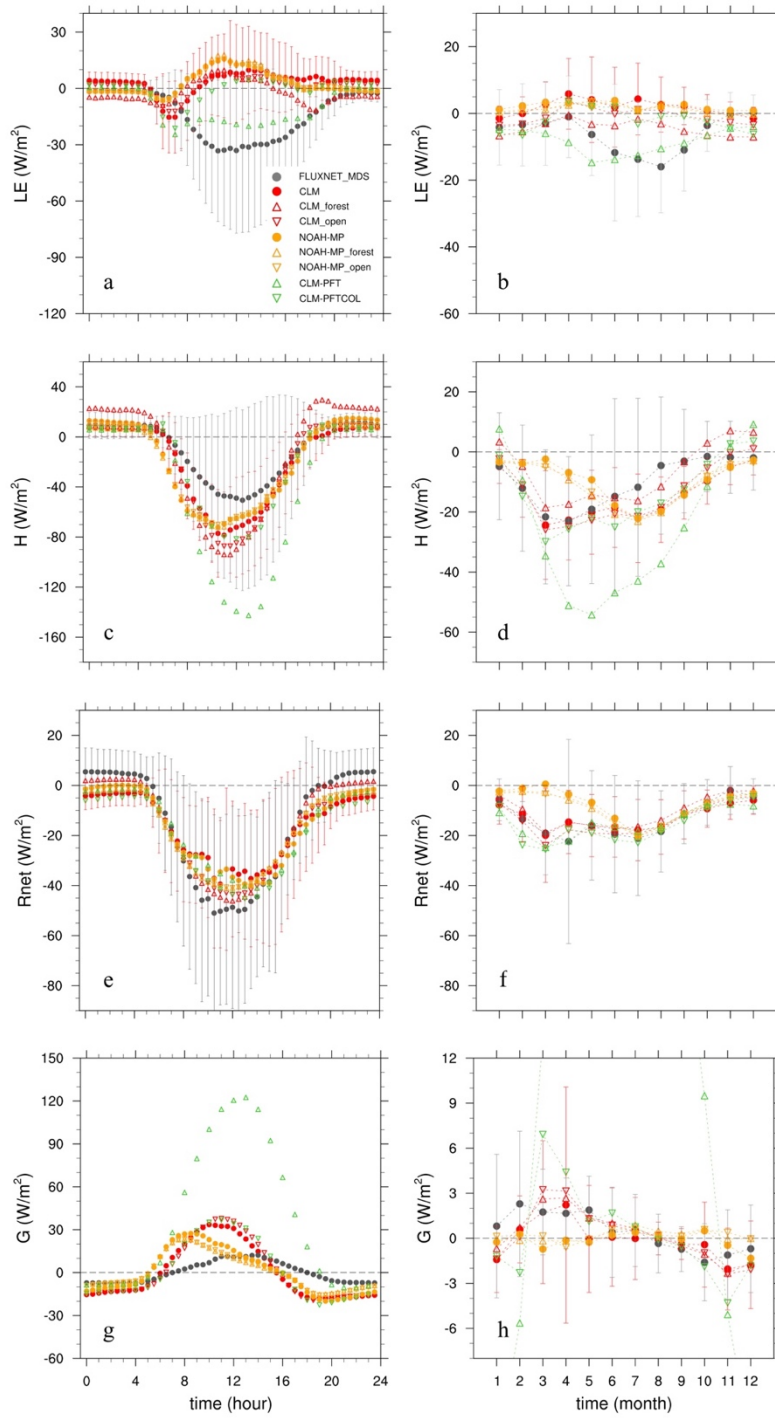

**Figure S1.** Change in the diurnal (left) and seasonal (right) cycle of  $LE$  ( $W/m^2$ , a-b),  $H$  ( $W/m^2$ , c-d),  $R_{net}$  ( $W/m^2$ , e-f), and  $G$  ( $W/m^2$ , g-h) from forest to open (open – forest) land excluding the pairs 3, 7, 12, and 15.

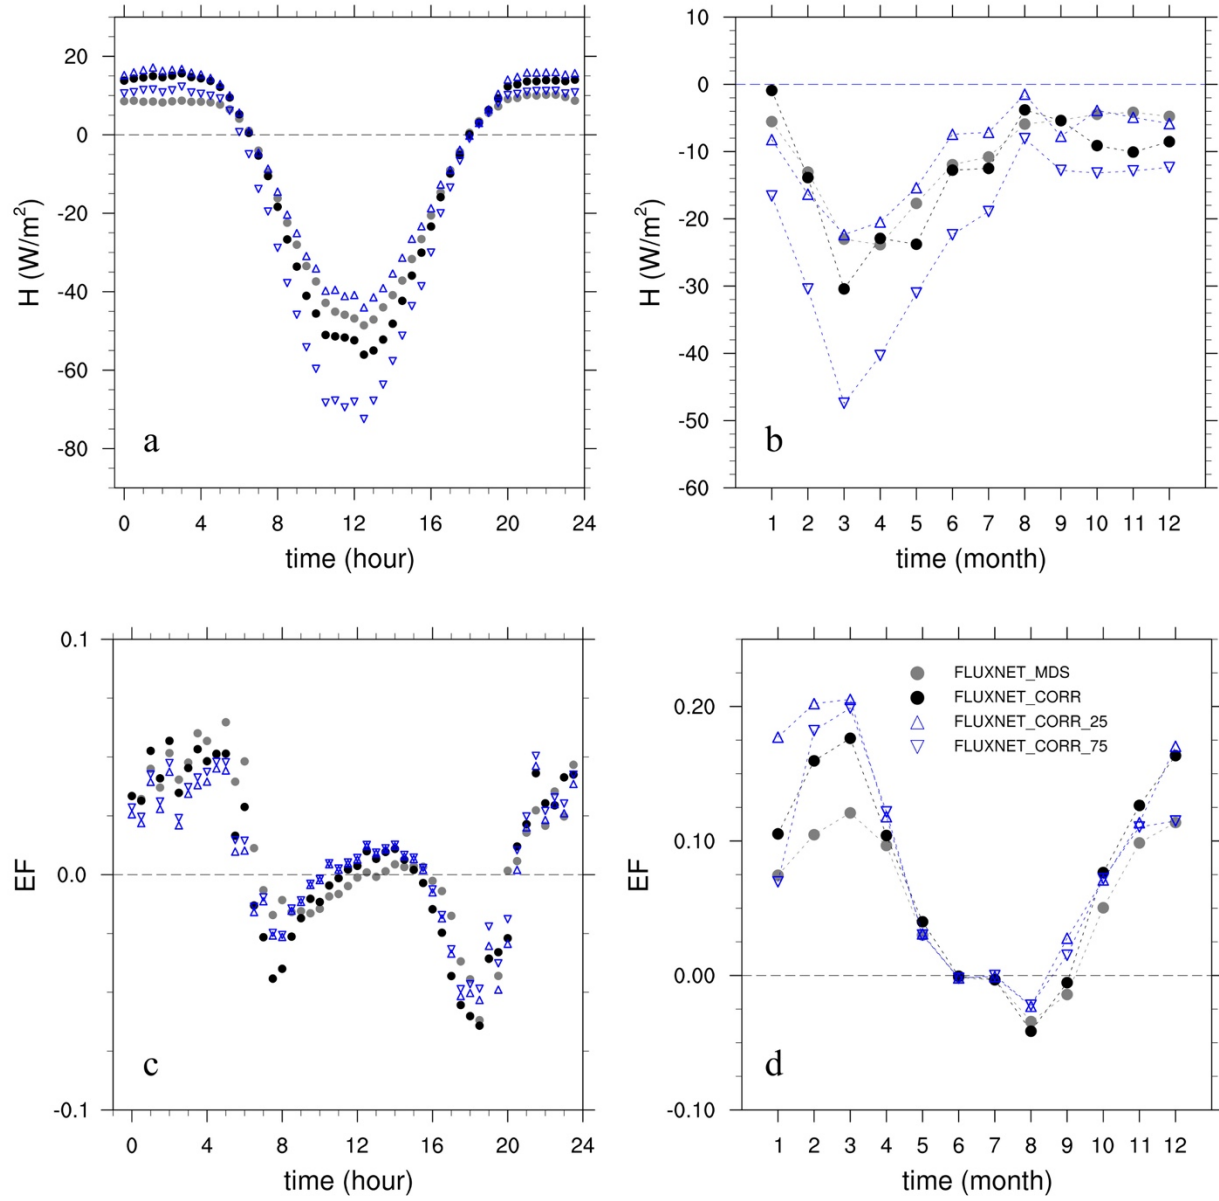

**Figure S2.** Change in the diurnal (left) and seasonal (right) cycle of  $H$  (W/m<sup>2</sup>, a-b) and evaporative fraction ( $EF$ , c-d) from forest to open land (open – forest) in the four types of FLUXNET observations.

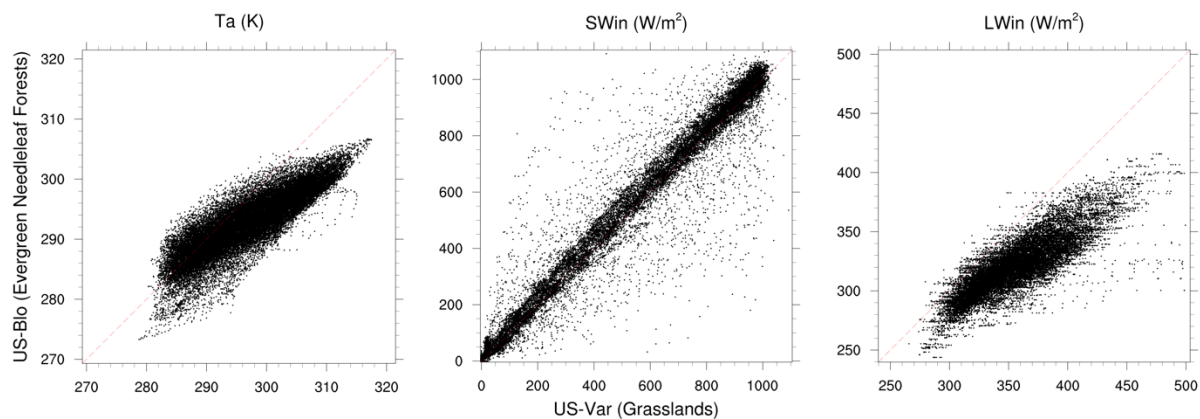

**Figure S3.** Comparison of air temperature (K, left), downwelling shortwave (middle) and longwave (right) radiations (W/m<sup>2</sup>) between the paired sites No. 15. The horizontal axis shows the observations from the grassland site US-Var, and the vertical axis shows the observations from the evergreen needleleaf forest site US-Blo.

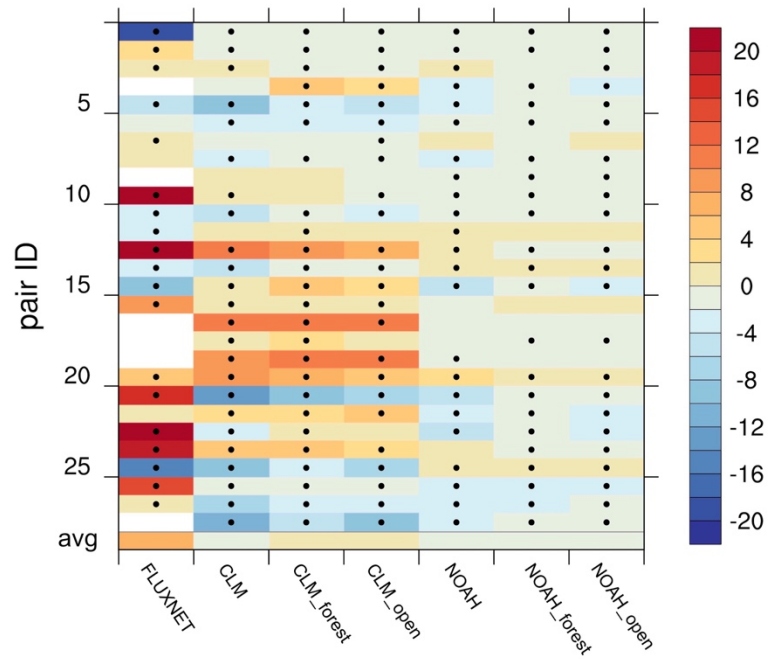

**Figure S4.** Change (open – forest) in observed and simulated daytime surface soil moisture (%) during summer (JJA, b). White areas indicate missing observations.
